# Supplementary material
Source: PubMed Central journal article supplement (PMC8349477)
Supplement: mmc2.pdf [file mmc2.pdf]

## **Supplemental Information**

### **Development of Wearable Air-Conditioned Mask for Personal Thermal Management**

Wing Sze Suen, Guanghan Huang, Zhanxiao Kang, Yuheng Gu, Jintu Fan, Dahua  
Shou\*

Institute of Textiles and Clothing, The Hong Kong Polytechnic University, Kowloon,  
Hong Kong, China

\*Corresponding author.

E-mail address: [dahua.shou@polyu.edu.hk](mailto:dahua.shou@polyu.edu.hk) (D. Shou)

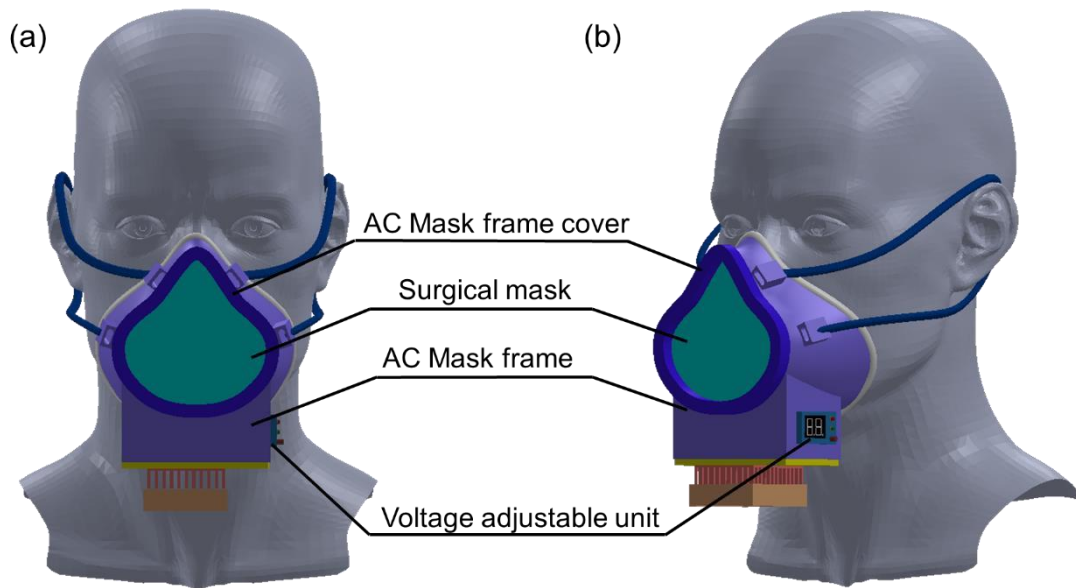

Figure S1. Illustration of AC Mask with (a) Front view (b) Side view.

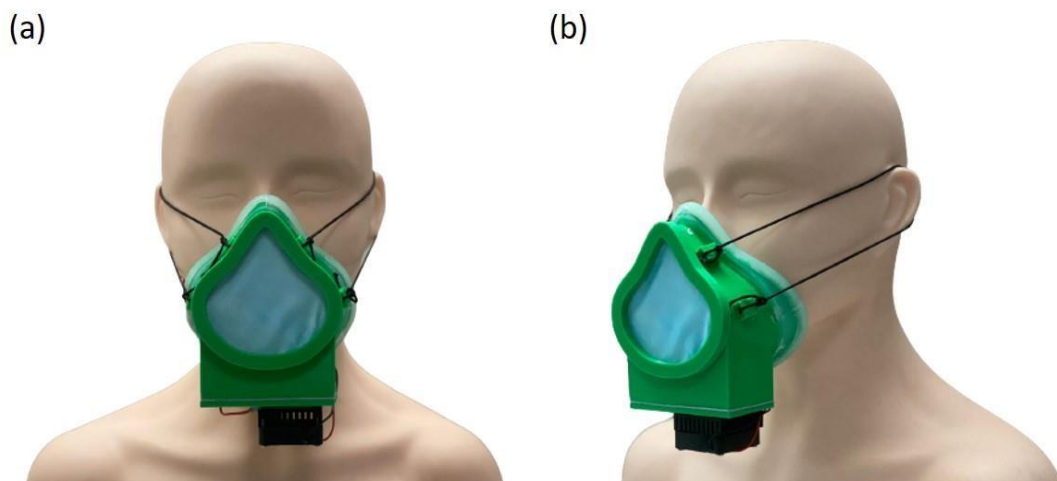

Figure S2. Prototype of AC Mask with (a) Front view (b) Side view.

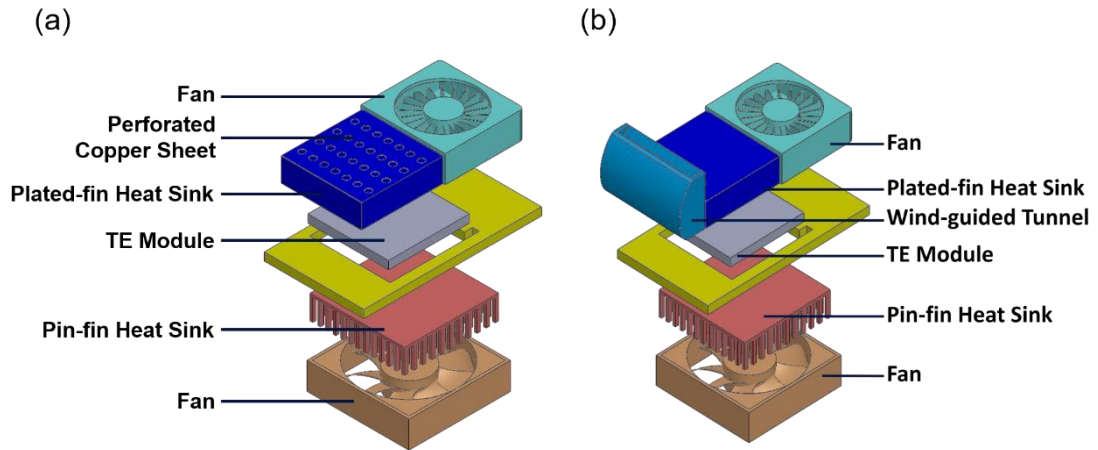

Figure S3. Illustration of thermoregulation unit in the AC Mask, with the heat exchanger made from (a) an aluminum plate-fin heat sink covered with a thin perforated copper sheet and (b) a plate-fin heat sink covered by an impermeable copper sheet with a 3D-printed wind-guided tunnel.

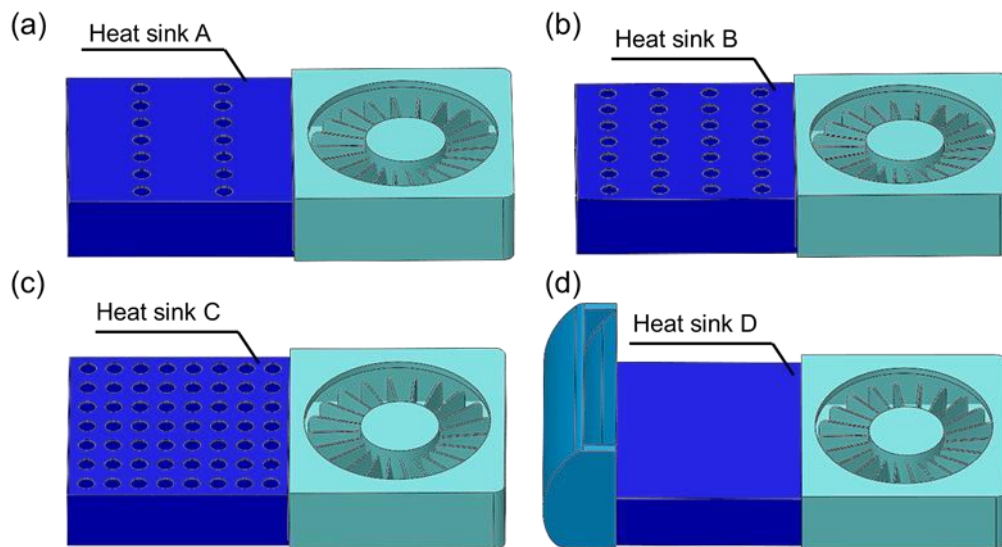

Figure S4. Structure of heat exchangers with (a) 2 rows of holes for each channel in the heat sink A, (b) 4 rows of holes for each channel in the heat sink B, (c) 8 rows of holes for each channel in the heat sink C, and (d) the wind guide in the heat sink D.

## Supplementary Note 1: The filtration performance of the AC Mask

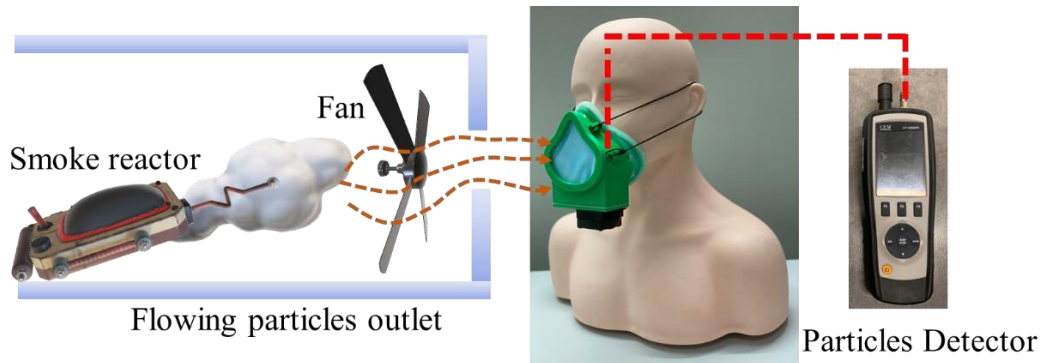

Figure S5. The filtration test setup of the proposed mask

Fig. S6 shows the enhanced filtration performance by the AC Mask compared to 3M™ N95. For example, the particle concentration of  $0.3 \mu\text{m}$  has been reduced from  $64.9 \text{ mg/m}^3$  to  $1.69 \text{ mg/m}^3$ . The reduced percentage for overall particles reaches as high as 80%-97%. The mechanism of the enhanced filtration performance is the better sealant of the proposed mask compared to the traditional mask. As reported by Xu M. et al. [1], a 5% gap between the mask and face can lead to a more than 60% reduction in filtration performance. The proposed mask effectively solves the sealant issue between the mask and face.

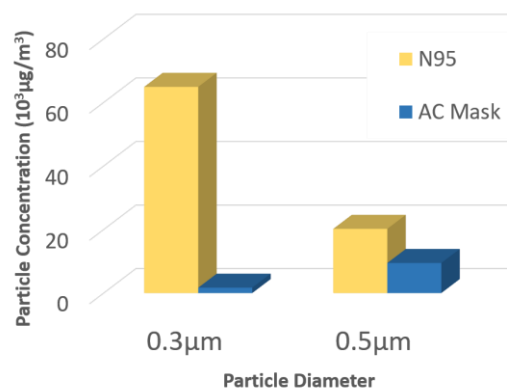

Figure S6. The comparison of particle concentrations induced by 3M™ N95 and AC Mask

Table

S1. Details of the Thermoregulation Unit

|                                                       | Hot Side  |                    | TE          | Cold Side |         |         |         | Fan             |
|-------------------------------------------------------|-----------|--------------------|-------------|-----------|---------|---------|---------|-----------------|
|                                                       | Heat Sink | Fan                |             | Heat Sink |         |         |         |                 |
| Code                                                  | 2         | A                  | TEC1-7104SR | A         | B       | C       | D       | G               |
| Dimensions<br>$\pm 1$ (mm)<br>(L(mm)*W(mm)<br>*H(mm)) | 40*40*10  | 40*40*10           | 30*30*5     | 30*30*5   | 30*30*5 | 30*30*5 | 30*30*5 | 30*30*6.5       |
| Air Blow<br>Direction                                 | -         | Blowing<br>Forward | -           | -         | -       | -       | -       | Side<br>Blowing |

Table  
S2. Details of the AC Mask Weight

|                              | AC Mask<br>Frame | Thermoregulation<br>Unit | Voltage<br>Adjustable<br>Unit | Desiccant<br>Bags | <b>Total<br/>Weight</b> |
|------------------------------|------------------|--------------------------|-------------------------------|-------------------|-------------------------|
| Weight (g)<br>$\pm 0.05$ (g) | 92.29            | 81.85                    | 14.37                         | 5.00              | <b>193.51</b>           |

Table

S3. Scales for thermal sensation and thermal preference [2]

| Scale | Thermal Sensation Vote (TSV)<br>(ASHRAE) | Thermal Preference (TP) |
|-------|------------------------------------------|-------------------------|
| -3    | Cold                                     |                         |
| -2    | Cool                                     | Much cooler             |
| -1    | Slightly cool                            | A bit cooler            |
| 0     | Neutral (neither cool nor warm)          | No change               |
| 1     | Slightly warm                            | A bit warmer            |
| 2     | Warm                                     | Much warmer             |
| 3     | Hot                                      |                         |

Note: ASHRAE: American Society of Heating, Refrigerating, and Air-Conditioning Engineers

Table

S4. Scale for humidity feeling and humidity preference [2]

| Scale | Humidity feeling (HF) | Humidity Preference (HP)   |
|-------|-----------------------|----------------------------|
| -3    | Very dry              |                            |
| -2    | Dry                   | Prefer much drier          |
| -1    | Slightly dry          | Prefer slightly drier      |
| 0     | Neither humid nor dry | No change                  |
| 1     | Slightly humid        | Prefer slightly more humid |
| 2     | Humid                 | Prefer much more humid     |
| 3     | Very humid            |                            |



Table

S5. Scale for overall comfort [3]

| Scale | Overall Comfortable (OC)              |
|-------|---------------------------------------|
| -3    | Very comfortable                      |
| -2    | Moderately comfortable                |
| -1    | Slightly comfortable                  |
| 0     | Neither comfortable nor uncomfortable |
| 1     | Slightly uncomfortable                |
| 2     | Moderately uncomfortable              |
| 3     | Very uncomfortable                    |

Table  
S6. Results of subjective evaluations

| Facemask | Var. | TSV   | TP    | HF    | HP    | OC    |
|----------|------|-------|-------|-------|-------|-------|
| AC Mask  | Mean | -1.13 | -1.20 | -0.80 | 0.27  | -0.73 |
|          | SD   | 0.92  | 0.77  | 1.08  | 0.70  | 1.39  |
| N95 Mask | Mean | 2.13  | -2.27 | 2.13  | -2.00 | 1.80  |
|          | SD   | 0.74  | 0.70  | 0.74  | 0.93  | 0.77  |

### **Supplementary Reference**

- [1] M. Xu, P. Lee, D.J.P.o. Collins, The critical importance of mask seals on respirator performance: An analytical and simulation approach, 16(2) (2021) e0246720.
- [2] S.A. Damiati, S.A. Zaki, H.B. Rijal, S.J.B. Wonorahardjo, Environment, Field study on adaptive thermal comfort in office buildings in Malaysia, Indonesia, Singapore, and Japan during hot and humid season, 109 (2016) 208-223.
- [3] M. Indraganti, R. Ooka, H.B.J.B. Rijal, Environment, Thermal comfort in offices in summer: Findings from a field study under the 'setsuden' conditions in Tokyo, Japan, 61 (2013) 114-132.
